# Supplementary material for: Evaluation of separation performance for eggshell-based reversed-phase HPLC columns by controlling particle size and application in quantitative therapeutic drug monitoring
Source: Royal Society of Chemistry journal article supplement (doi:10.1039/d3ay00219e), 2023-01-01
Supplement: d3ay00219e1.pdf [file d3ay00219e1.pdf]

† Electronic Supplementary Information (ESI)

Evaluation of separation performance for eggshell-based reversed-phase HPLC columns by controlling particle size and application in quantitative therapeutic drug monitoring

*Tomoka Yoshii, Kohei Nakano, Tomoaki Okuda, Daniel Citterio and Yuki Hiruta\**

Department of Applied Chemistry, Faculty of Science and Technology, Keio University  
3-14-1 Hiyoshi, Kohoku-ku, Yokohama, Kanagawa 223-8522, Japan.

\*To whom correspondence should be addressed.

Tel: +81 45 566 1568; Fax: +81 45 566 1568; Email: [hiruta@aplc.keio.ac.jp](mailto:hiruta@aplc.keio.ac.jp)

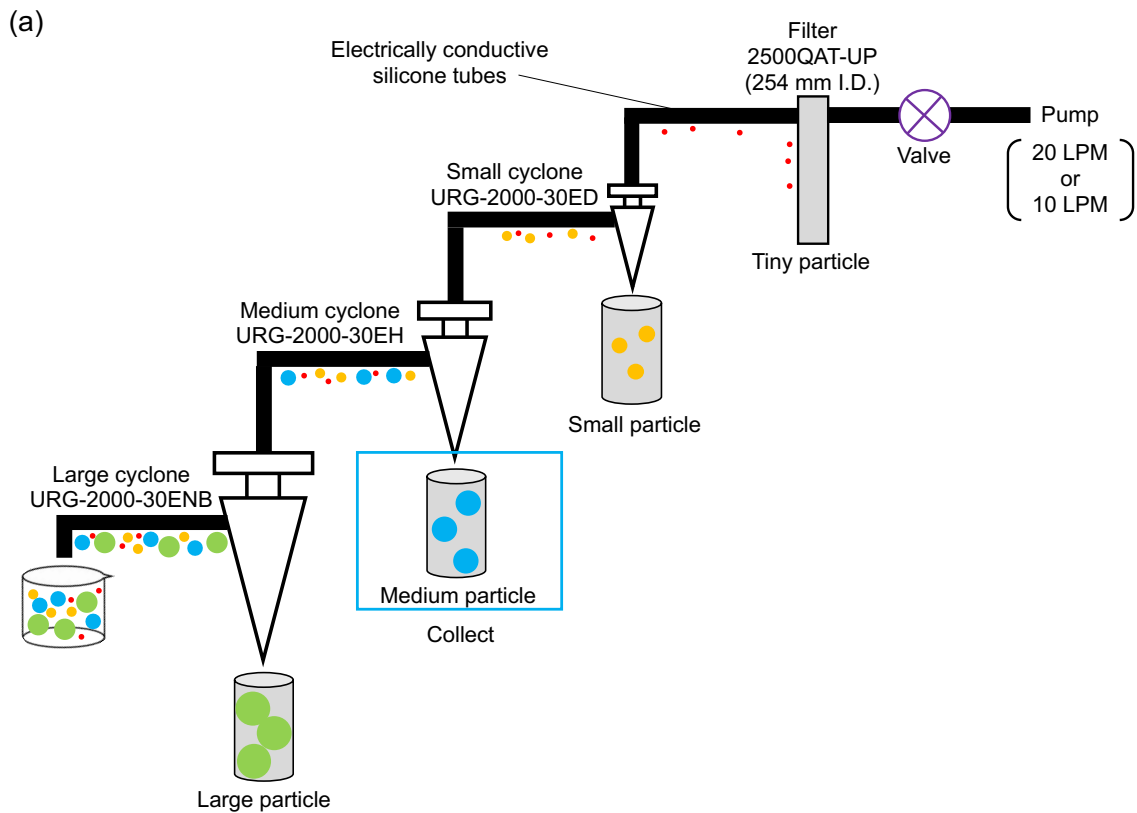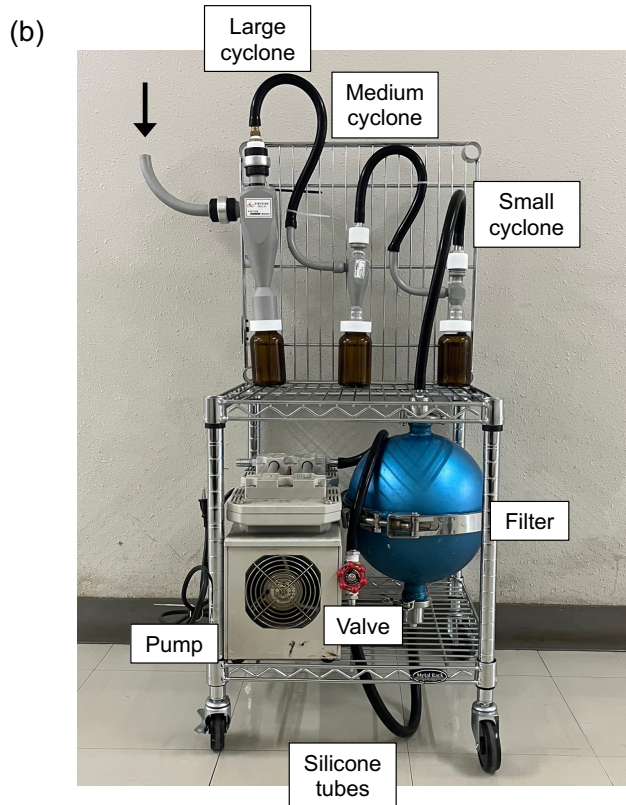

**Fig. S1** (a) Schematic illustration and (b) photograph of classification system with cyclones.

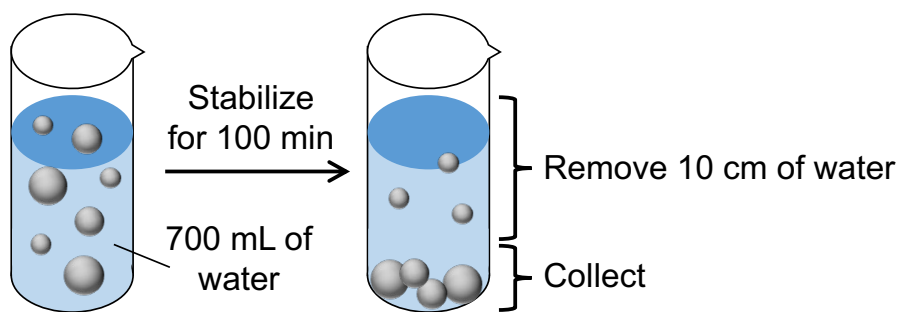

**Fig. S2** Removal of tiny particles by sedimentation separation.

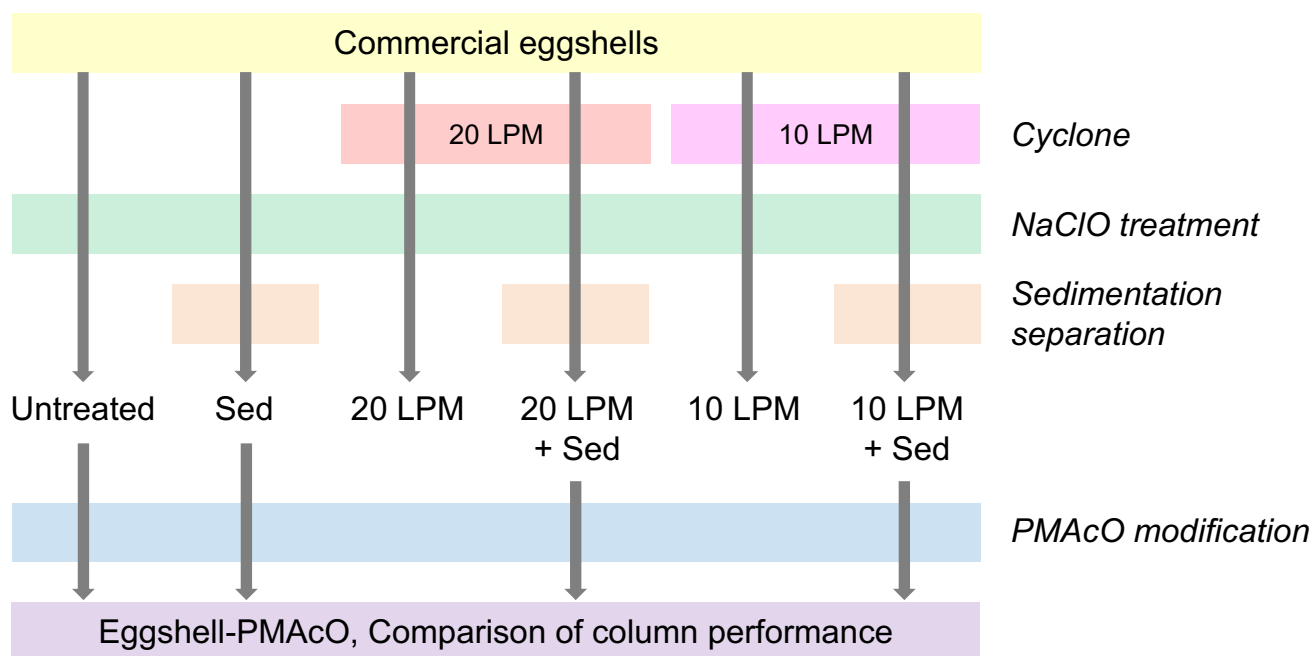

**Fig. S3** The treatment performed on each particle.

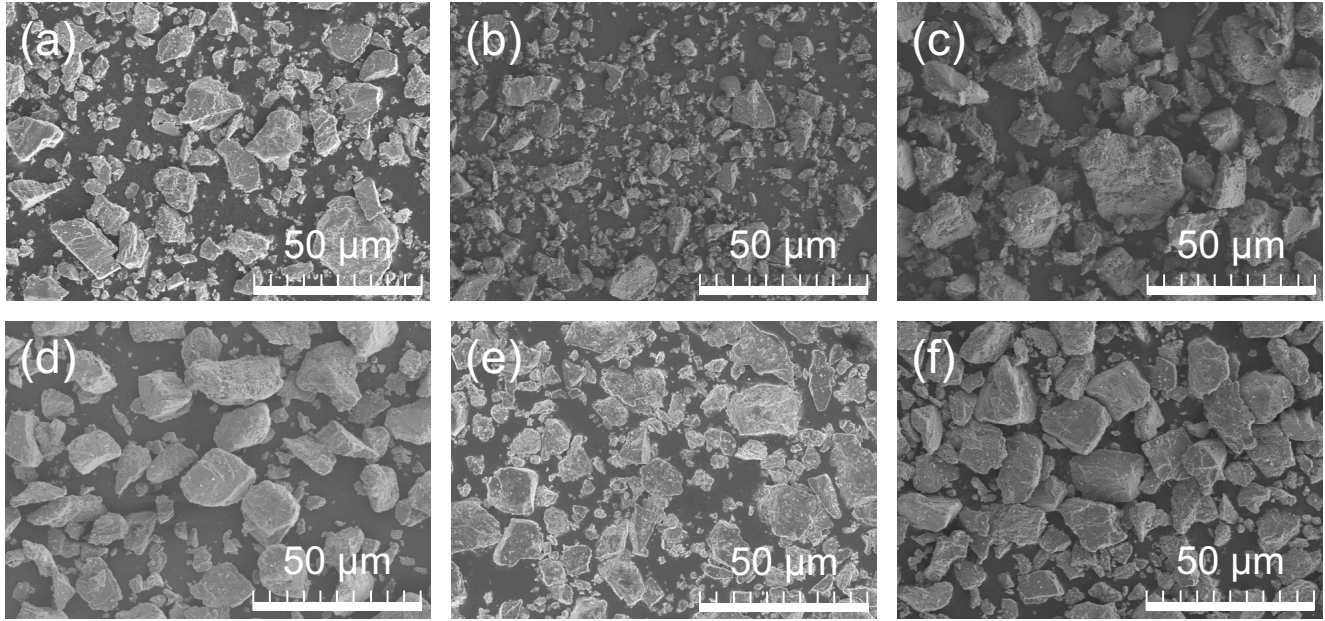

**Fig. S4** Higher magnification SEM images of of Fig. 2 in the main text. (a) Untreated, (b) 20 LPM, (c) 10 LPM, (d) Sed, (e) 20 LPM + Sed, and (f) 10 LPM + Sed.

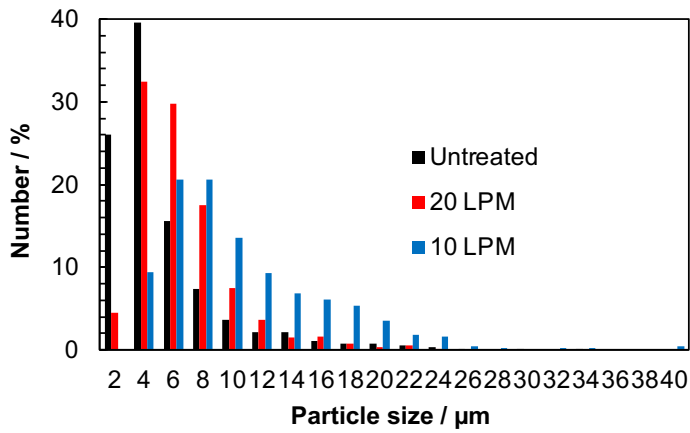

**Fig. S5** Particle size distributions of eggshells before and after classification by cyclones.

**Table S1** The percentage of particles smaller than 4  $\mu\text{m}$ .

|           | Before sedimentation separation / % | After sedimentation separation / % |
|-----------|-------------------------------------|------------------------------------|
| Untreated | 65.6                                | 42.9                               |
| 20 LPM    | 37.0                                | 21.0                               |
| 10 LPM    | 9.43                                | 2.85                               |

**Table S2** Organic contents in the particles.

|              | Before modification<br>with PMAcO / % | After modification<br>with PMAcO / % |
|--------------|---------------------------------------|--------------------------------------|
| Untreated    | 0.69                                  | 0.95                                 |
| Sed          | 0.66                                  | 1.04                                 |
| 20 LPM + Sed | 0.70                                  | 1.11                                 |
| 10 LPM + Sed | 0.70                                  | 1.00                                 |

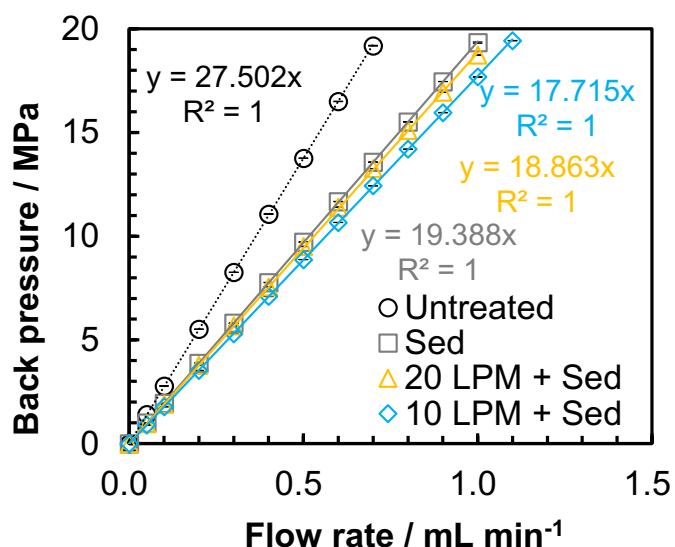**Fig. S6** Back pressure of the columns relative to the flow rate of mobile phase. Analytical conditions: water/methanol (60/40, v/v),  $n = 3$ .**Table S3** *A*, *B* and *C* terms of van Deemter equation.

|              | <i>A</i> | <i>B</i> | <i>C</i> |
|--------------|----------|----------|----------|
| Sed          | 31.0     | 0.652    | 14.7     |
| 20 LPM + Sed | 35.5     | 2.10     | 19.6     |
| ODS          | 0.307    | 3.28     | 7.32     |

**Table S4**  $R_s$  of alkylbenzenes from the chromatogram shown in Fig. 4a of the main text.

| C1 | C2   | C3   | C4   | C5   | C6   | C7   | C8   | C9   | C10  |
|----|------|------|------|------|------|------|------|------|------|
| –  | 3.10 | 5.26 | 5.72 | 5.11 | 4.39 | 3.81 | 3.30 | 2.94 | 3.03 |

**Table S5**  $R_s$  of steroids from the chromatogram shown in Fig. 4b of the main text.

| Prednisolone | Hydrocortisone | Hydrocortisone acetate | Dexamethasone | Testosterone |
|--------------|----------------|------------------------|---------------|--------------|
| –            | 1.61           | 1.55                   | 3.75          | 3.01         |

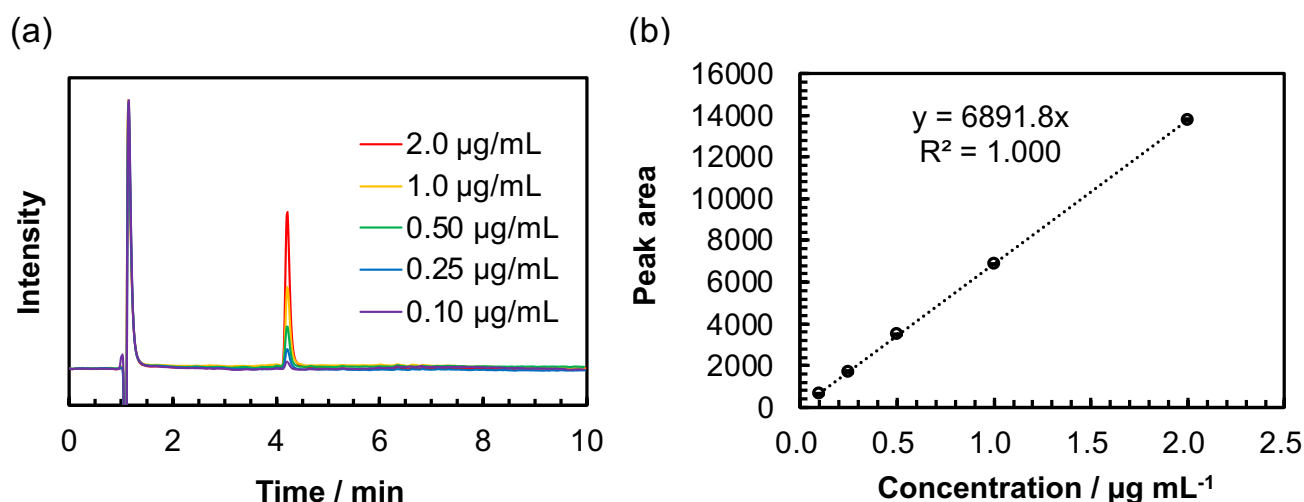

**Fig. S7** (a) Chromatograms of voriconazole. Analytical conditions: water/methanol (90/10, v/v) for 1 min, followed by the gradient elution to 30/70 (v/v) for 4 min and finally 30/70 (v/v) for 5 min, 1.0 mL/min, 0.1–2.0 µg/mL voriconazole, 10 µL injection, detected at 254 nm. (b) Calibration curve of voriconazole based on the chromatograms in Fig. S7a,  $n = 3$ .

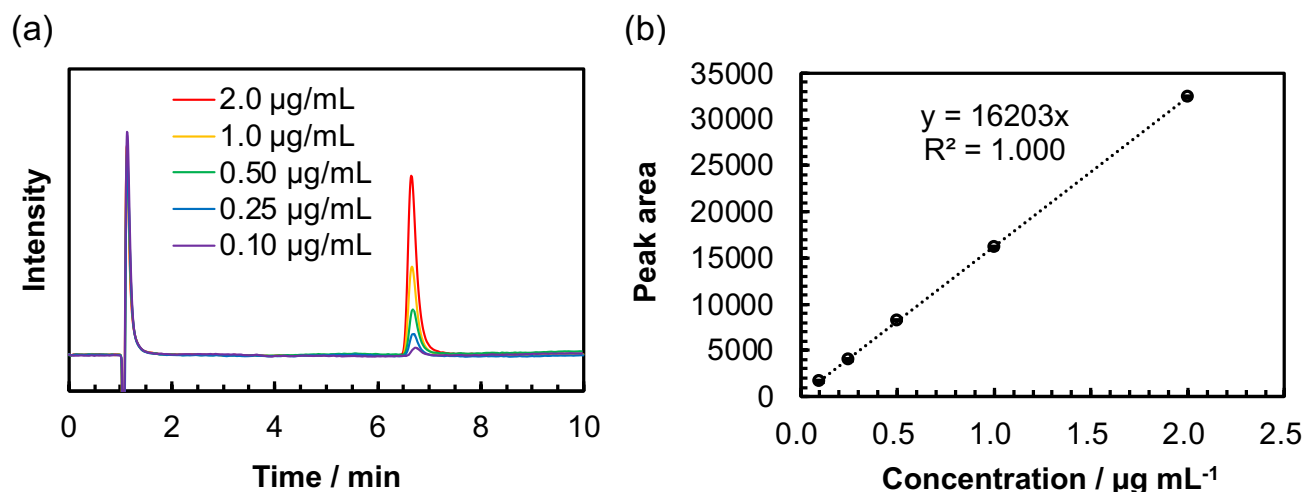

**Fig. S8** (a) Chromatograms of imatinib. Analytical conditions: 10 mM Na<sub>2</sub>B<sub>4</sub>O<sub>7</sub> buffer (pH = 10.8)/methanol (90/10, v/v) for 1 min, followed by the gradient elution to 70/30 (v/v) for 3 min and finally 70/30 (v/v) for 6 min, 1.0 mL/min, 0.1–2.0 µg/mL imatinib, 10 µL injection, detected at 285 nm. (b) Calibration curve of imatinib based on the chromatograms in Fig. S8a,  $n = 3$ .

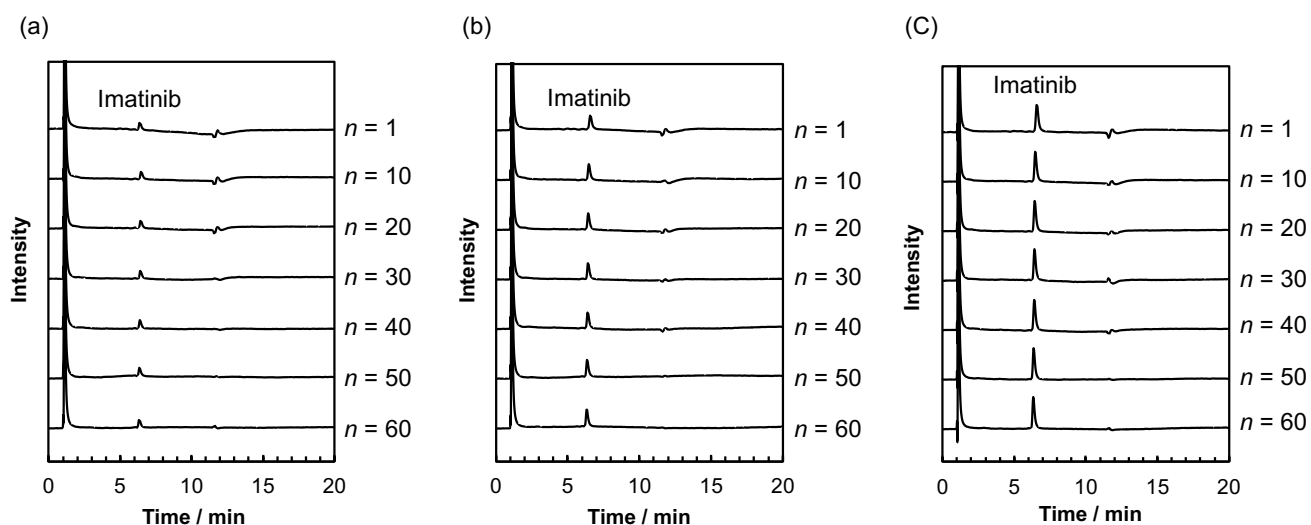

**Fig. S9** Chromatograms during routine analysis of three different concentrations of imatinib-spiked whole blood samples (a) 0.75  $\mu\text{g/mL}$ , (b) 1.5  $\mu\text{g/mL}$ , (c) 3.0  $\mu\text{g/mL}$ . Analytical conditions: 10 mM  $\text{Na}_2\text{B}_4\text{O}_7$  buffer (pH = 10.8)/methanol (90/10, v/v) for 1 min, followed by the gradient elution to 70/30 (v/v) for 3 min, 70/30 (v/v) for 6 min, and finally 90/10 (v/v) for 10 min, 1.0 mL/min, 0.75–3.0  $\mu\text{g/mL}$  imatinib in whole blood (After pretreatment: 0.15–0.6  $\mu\text{g/mL}$ ), 10  $\mu\text{L}$  injection, detected at 285 nm.

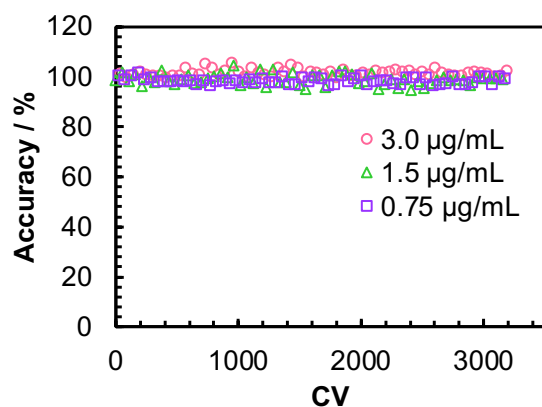

**Fig. S10** Change in accuracy during routine analysis of three different concentrations of imatinib-spiked whole blood samples. Analytical conditions: 10 mM  $\text{Na}_2\text{B}_4\text{O}_7$  buffer (pH = 10.8)/methanol (90/10, v/v) for 1 min, followed by the gradient elution to 70/30 (v/v) for 3 min, 70/30 (v/v) for 6 min, and finally 90/10 (v/v) for 10 min, 1.0 mL/min, 0.75–3.0  $\mu\text{g/mL}$  imatinib (After pretreatment: 0.15–0.6  $\mu\text{g/mL}$ ), 10  $\mu\text{L}$  injection, detected at 285 nm.

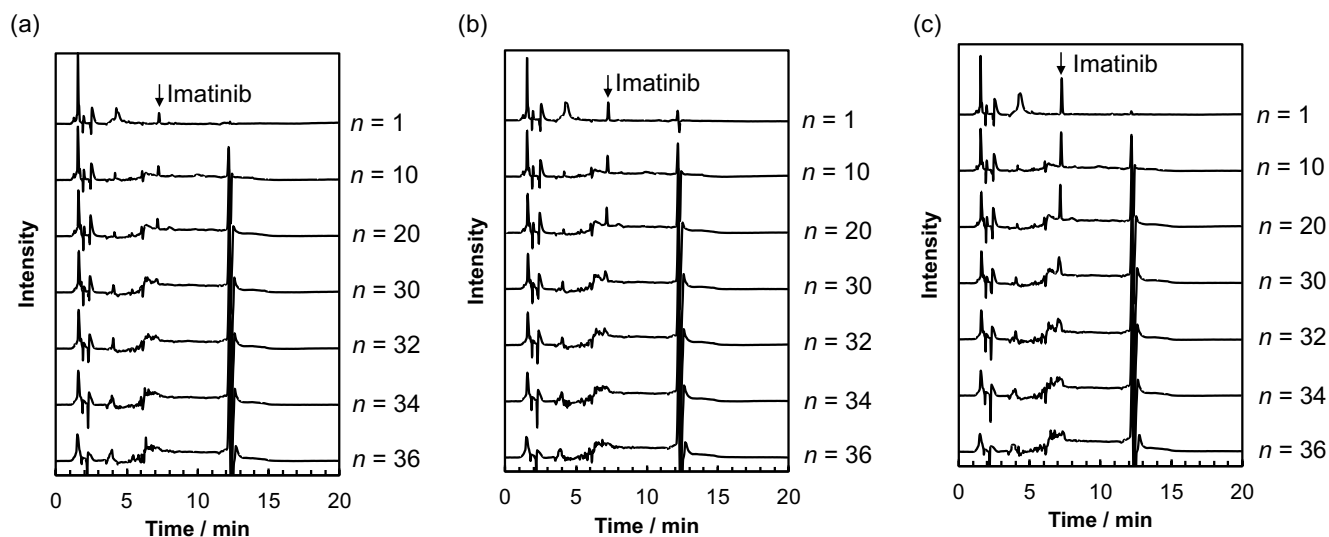

**Fig. S11** Chromatograms of three different concentrations of imatinib-spiked whole blood samples (a) 0.75  $\mu\text{g/mL}$ , (b) 1.5  $\mu\text{g/mL}$ , (c) 3.0  $\mu\text{g/mL}$  using a commercial ODS column. Analytical conditions: 10 mM  $\text{Na}_2\text{B}_4\text{O}_7$  buffer (pH = 10.8)/methanol (90/10, v/v) for 1 min, followed by the gradient elution to 20/80 (v/v) for 3 min, 20/80 (v/v) for 6 min, and finally 90/10 (v/v) for 10 min, 1.0 mL/min, 0.75–3.0  $\mu\text{g/mL}$  imatinib in whole blood (After pretreatment: 0.15–0.6  $\mu\text{g/mL}$ ), 10  $\mu\text{L}$  injection, detected at 285 nm.

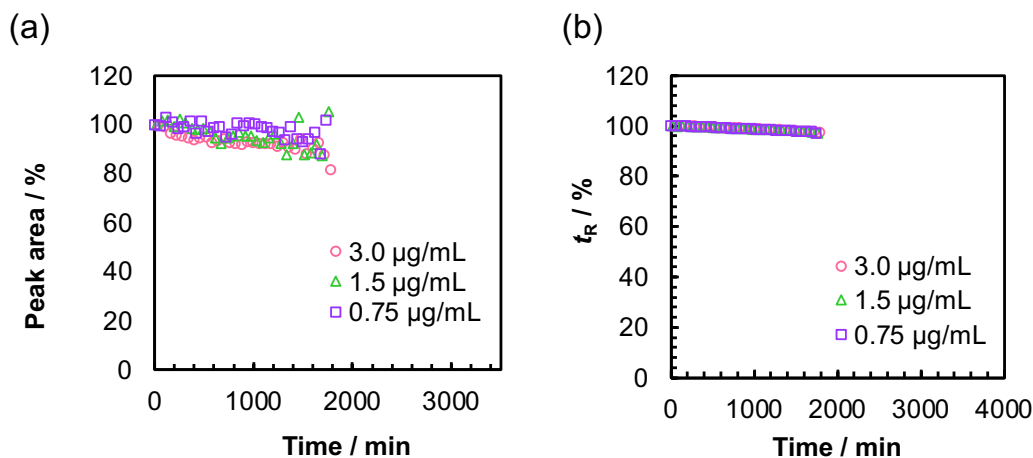

**Fig. S12** Changes in (a) peak areas and (b) retention times of three different concentrations of imatinib-spiked whole blood samples using a commercial ODS column. Analytical conditions: 10 mM  $\text{Na}_2\text{B}_4\text{O}_7$  buffer (pH = 10.8)/methanol (90/10, v/v) for 1 min, followed by the gradient elution to 20/80 (v/v) for 3 min, 20/80 (v/v) for 6 min, and finally (90/10, v/v) for 10 min, 1.0 mL/min, 0.75–3.0  $\mu\text{g/mL}$  imatinib in whole blood (After pretreatment: 0.15–0.6  $\mu\text{g/mL}$ ), 10  $\mu\text{L}$  injection, detected at 285 nm.
